# Supplementary material
Source: publisher figshare collection journal article supplement (https://geolsoc.figshare.com/articles/dataset/_/3454541)
Supplement: Supplementary file 1 [file 1]

**Table 2***Sm and Nd isotopic data for granitoids from the Grampian Highlands*

| Sample                                 | Age [Ma] | Sm [ppm] | Nd [ppm] | $^{147}\text{Sm}/^{144}\text{Nd}$ | $^{143}\text{Nd}/^{144}\text{Nd}$ | $2\sigma_{(\text{mean})}$ | $\epsilon_{\text{Nd}(t)}$ | $T_{\text{DM}}$ [Ga] |
|----------------------------------------|----------|----------|----------|-----------------------------------|-----------------------------------|---------------------------|---------------------------|----------------------|
| Collision stage                        |          |          |          |                                   |                                   |                           |                           |                      |
| RC-15                                  | 511      | 3.55     | 16.98    | 0.1263                            | $0.511683 \pm 12$                 |                           | -14.1                     | 2.3                  |
| DH-2                                   | 481      | 1.44     | 5.29     | 0.1646                            | $0.511835 \pm 12$                 |                           | -13.7                     | 2.3                  |
| M-4                                    | 452      | 3.89     | 25.03    | 0.0939                            | $0.511759 \pm 12$                 |                           | -11.2                     | 2.0                  |
| GK-3                                   | 451      | 1.99     | 9.26     | 0.1299                            | $0.511866 \pm 12$                 |                           | -11.2                     | 2.0                  |
| Subduction stage                       |          |          |          |                                   |                                   |                           |                           |                      |
| P-22                                   | 425      | 12.29    | 72.23    | 0.1028                            | $0.512165 \pm 14$                 |                           | -4.1                      | 1.4                  |
| P-25                                   | 425      | 5.38     | 17.00    | 0.1912                            | $0.512306 \pm 12$                 |                           | -6.2                      | 1.6                  |
| P-27                                   | 425      | 10.69    | 52.57    | 0.1229                            | $0.512080 \pm 12$                 |                           | -6.9                      | 1.5                  |
| MC-5                                   | 420      | 3.99     | 25.96    | 0.0930                            | $0.512201 \pm 12$                 |                           | -3.0                      | 1.3                  |
| GD-16                                  | 419      | 4.75     | 22.87    | 0.1256                            | $0.512141 \pm 12$                 |                           | -5.9                      | 1.5                  |
| GG-11                                  | 415      | 3.71     | 9.94     | 0.2259                            | $0.512388 \pm 11$                 |                           | -6.4                      | 1.6                  |
| GG-12                                  | 415      | 6.41     | 37.93    | 0.1021                            | $0.512272 \pm 12$                 |                           | -2.1                      | 1.2                  |
| B-13                                   | 408      | 5.92     | 36.52    | 0.0981                            | $0.512113 \pm 12$                 |                           | -5.1                      | 1.5                  |
| MB-19                                  | 406      | 4.52     | 26.58    | 0.1028                            | $0.512169 \pm 12$                 |                           | -4.3                      | 1.4                  |
| LL-9                                   | 406      | 6.51     | 35.98    | 0.1094                            | $0.512187 \pm 12$                 |                           | -4.3                      | 1.4                  |
| Published data of following intrusions |          |          |          |                                   |                                   |                           |                           |                      |
| Ben Vuirich <sup>a</sup>               | 590      | 6.32     | 25.49    | 0.1498                            | $0.512183 \pm 10$                 |                           | -5.3                      | 1.7                  |
| Ben Vuirich <sup>a</sup>               | 590      | 9.12     | 43.58    | 0.1262                            | $0.512146 \pm 7$                  |                           | -4.3                      | 1.6                  |
| Ben Vuirich <sup>a</sup>               | 590      | 3.58     | 13.07    | 0.1654                            | $0.512195 \pm 8$                  |                           | -6.3                      | 1.7                  |
| Ben Vuirich <sup>a</sup>               | 590      | 12.78    | 66.09    | 0.1167                            | $0.512088 \pm 9$                  |                           | -4.7                      | 1.6                  |
| Ben Vuirich <sup>a</sup>               | 590      | 12.05    | 51.21    | 0.1421                            | $0.512120 \pm 7$                  |                           | -6.0                      | 1.7                  |
| Ben Vuirich <sup>a</sup>               | 590      | 9.31     | 39.96    | 0.1405                            | $0.512096 \pm 11$                 |                           | -6.3                      | 1.7                  |
| Ben Vuirich <sup>b</sup>               | 590      | 8.54     | 38.70    | 0.1326                            | $0.512137 \pm 32$                 |                           | -4.9                      | 1.6                  |
| Strichen <sup>b</sup>                  | 467      | 8.04     | 44.67    | 0.1082                            | $0.511821 \pm 16$                 |                           | -10.7                     | 2.0                  |
| Aberdeen <sup>b</sup>                  | 470      | 11.40    | 57.08    | 0.1212                            | $0.511766 \pm 41$                 |                           | -12.5                     | 2.1                  |
| Strathspey <sup>c</sup>                | 449      | 3.01     | 19.00    | 0.0957                            | $0.511735 \pm 23$                 |                           | -11.8                     | 2.1                  |
| Findhorn <sup>d</sup>                  | 443      | 2.59     | 11.14    | 0.1407                            | $0.411930 \pm 18$                 |                           | -10.7                     | 2.0                  |
| Strath Ossian <sup>d</sup>             | 428      | 5.24     | 23.33    | 0.1357                            | $0.512151 \pm 20$                 |                           | -6.2                      | 1.6                  |
| Foyers <sup>b</sup>                    | 426      | 9.93     | 59.90    | 0.0996                            | $0.512009 \pm 30$                 |                           | -7.0                      | 1.7                  |
| Foyers <sup>b</sup>                    | 426      | 12.50    | 72.05    | 0.1043                            | $0.511963 \pm 24$                 |                           | -8.1                      | 1.8                  |
| Foyers <sup>b</sup>                    | 426      | 4.48     | 34.04    | 0.0792                            | $0.511883 \pm 29$                 |                           | -8.3                      | 1.8                  |
| Foyers <sup>b</sup>                    | 426      | 1.77     | 12.69    | 0.0839                            | $0.511971 \pm 22$                 |                           | -6.9                      | 1.7                  |
| Foyers <sup>b</sup>                    | 426      | 2.42     | 16.71    | 0.0870                            | $0.511993 \pm 31$                 |                           | -6.6                      | 1.6                  |
| Foyers <sup>b</sup>                    | 426      | 1.76     | 13.06    | 0.0811                            | $0.512026 \pm 26$                 |                           | -5.7                      | 1.6                  |
| Lochnagar <sup>d</sup>                 | 417      | 5.06     | 30.21    | 0.1012                            | $0.512236 \pm 22$                 |                           | -2.8                      | 1.3                  |
| Hill of Fare <sup>d</sup>              | 403      | 5.11     | 25.51    | 0.1210                            | $0.512339 \pm 31$                 |                           | -1.9                      | 1.3                  |

$\epsilon_{\text{Nd}(t)}$  values were calculated for magmatic ages (see appendix for references).  $T_{\text{DM}}$  ages were calculated according to the two-stage model of Liew & Hofmann (1988). The model considers two stages of differentiation, separation to a depleted mantle reservoir and to a continental crust reservoir. Isotope data of a) Tanner et al. (2006), b) Hamilton et al. (1980), c) Clayburn (1988), and d) Halliday (1984) were recalculated with the new zircon ages reported by Oliver et al. (this issue). The  $\epsilon_{\text{Nd}(t)}$  values of Aberdeen and Lochnagar intrusions were calculated with the monazite ages of Kneller & Aftalion (1987) and Parry (pers. com.). The initial ratio of Ben Vuirich granite is based on the TIMS zircon age of Roger et al. (1989).
